# Supplementary material
Source: Research Square preprint supplement (doi:10.21203/rs.3.rs-9910570/v1)

---

The following ALERTS were generated. Each ALERT has the format  
**test-name\_ALERT\_alert-type\_alert-level.**

Click on the hyperlinks for more details of the test.

---

● **Alert level C**

PLAT041\_ALERT\_1\_C Calc. and Reported SumFormula Strings Differ Please Check  
PLAT043\_ALERT\_1\_C Calculated and Reported Mol. Weight Differ by .. 1.99 Check  
PLAT068\_ALERT\_1\_C Reported F000 Differs from Calcd (or Missing)... Please Check  
PLAT341\_ALERT\_3\_C Low Bond Precision on C-C Bonds ..... 0.0065 Ang.

---

● **Alert level G**

FORMU01\_ALERT\_1\_G There is a discrepancy between the atom counts in the  
\_chemical\_formula\_sum and \_chemical\_formula\_moiety. This is  
usually due to the moiety formula being in the wrong format.  
Atom count from \_chemical\_formula\_sum: C11 H12 Br1 F1 N5 O3  
Atom count from \_chemical\_formula\_moiety:C10 H12 Br1 F1 N6 O3

FORMU01\_ALERT\_2\_G There is a discrepancy between the atom counts in the  
\_chemical\_formula\_sum and the formula from the \_atom\_site\* data.  
Atom count from \_chemical\_formula\_sum:C11 H12 Br1 F1 N5 O3  
Atom count from the \_atom\_site data: C10 H12 Br1 F1 N6 O3

CELLZ01\_ALERT\_1\_G Difference between formula and atom\_site contents detected.  
CELLZ01\_ALERT\_1\_G ALERT: Large difference may be due to a  
symmetry error - see SYMMG tests  
From the CIF: \_cell\_formula\_units\_Z 4  
From the CIF: \_chemical\_formula\_sum C11 H12 Br F N5 O3  
TEST: Compare cell contents of formula and atom\_site data

| atom | Z*formula | cif sites | diff  |
|------|-----------|-----------|-------|
| C    | 44.00     | 40.00     | 4.00  |
| H    | 48.00     | 48.00     | 0.00  |
| Br   | 4.00      | 4.00      | 0.00  |
| F    | 4.00      | 4.00      | 0.00  |
| N    | 20.00     | 24.00     | -4.00 |
| O    | 12.00     | 12.00     | 0.00  |

PLAT007\_ALERT\_5\_G Number of Unrefined Donor-H Atoms ..... 6 Report  
PLAT398\_ALERT\_2\_G Deviating C-O-C Angle From 120 for O2 . 109.6 Degree  
PLAT432\_ALERT\_2\_G Short Inter X...Y Contact Br1 ..C2 . 3.33 Ang.  
1-x,1/2+y,3/2-z = 3\_656 Check

PLAT791\_ALERT\_4\_G Model has Chirality at C1 (Sohnke SpGr) R Verify  
PLAT791\_ALERT\_4\_G Model has Chirality at C5 (Sohnke SpGr) R Verify  
PLAT791\_ALERT\_4\_G Model has Chirality at C8 (Sohnke SpGr) R Verify  
PLAT791\_ALERT\_4\_G Model has Chirality at C9 (Sohnke SpGr) R Verify  
PLAT978\_ALERT\_2\_G Number C-C Bonds with Positive Residual Density. 4 Info

---

0 **ALERT level A** = Most likely a serious problem - resolve or explain  
0 **ALERT level B** = A potentially serious problem, consider carefully  
4 **ALERT level C** = Check. Ensure it is not caused by an omission or oversight  
12 **ALERT level G** = General information/check it is not something unexpected

6 ALERT type 1 CIF construction/syntax error, inconsistent or missing data

4 ALERT type 2 Indicator that the structure model may be wrong or deficient  
1 ALERT type 3 Indicator that the structure quality may be low  
4 ALERT type 4 Improvement, methodology, query or suggestion  
1 ALERT type 5 Informative message, check

---

---

It is advisable to attempt to resolve as many as possible of the alerts in all categories. Often the minor alerts point to easily fixed oversights, errors and omissions in your CIF or refinement strategy, so attention to these fine details can be worthwhile. In order to resolve some of the more serious problems it may be necessary to carry out additional measurements or structure refinements. However, the purpose of your study may justify the reported deviations and the more serious of these should normally be commented upon in the discussion or experimental section of a paper or in the "special\_details" fields of the CIF. checkCIF was carefully designed to identify outliers and unusual parameters, but every test has its limitations and alerts that are not important in a particular case may appear. Conversely, the absence of alerts does not guarantee there are no aspects of the results needing attention. It is up to the individual to critically assess their own results and, if necessary, seek expert advice.

#### **Publication of your CIF in IUCr journals**

A basic structural check has been run on your CIF. These basic checks will be run on all CIFs submitted for publication in IUCr journals (*Acta Crystallographica*, *Journal of Applied Crystallography*, *Journal of Synchrotron Radiation*); however, if you intend to submit to *Acta Crystallographica Section C* or *E* or *IUCrData*, you should make sure that full publication checks are run on the final version of your CIF prior to submission.

#### **Publication of your CIF in other journals**

Please refer to the *Notes for Authors* of the relevant journal for any special instructions relating to CIF submission.

---

**PLATON version of 12/09/2022; check.def file version of 09/08/2022**

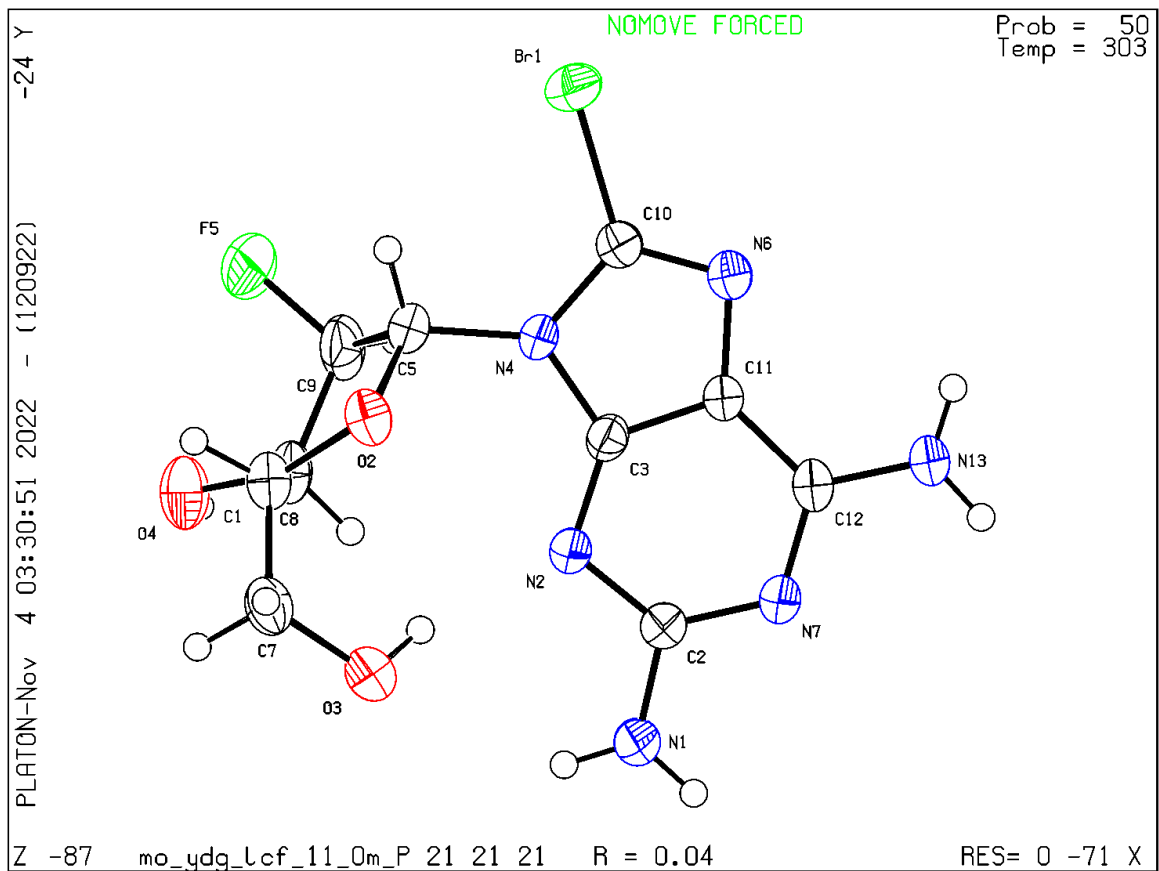

Supplement: Supplementary file 1 [file 1cbf88f67cddbf19ae065e62.pdf]
