# Supplementary material
Source: Research Square preprint supplement (doi:10.21203/rs.3.rs-9910570/v1)

## checkCIF/PLATON report

Structure factors have been supplied for datablock(s) mo\_mo\_ydg\_lcf\_oh\_003\_0m\_a

THIS REPORT IS FOR GUIDANCE ONLY. IF USED AS PART OF A REVIEW PROCEDURE FOR PUBLICATION, IT SHOULD NOT REPLACE THE EXPERTISE OF AN EXPERIENCED CRYSTALLOGRAPHIC REFEREE.

No syntax errors found.      CIF dictionary      Interpreting this report

### Datablock: mo\_mo\_ydg\_lcf\_oh\_003\_0m\_a

---

Bond precision:      C-C = 0.0061 A

Wavelength=0.71073

Cell:                      a=4.9126(7)                      b=9.9394(15)                      c=10.4255(15)  
                                    alpha=103.125(5)                      beta=98.340(5)                      gamma=101.211(5)  
Temperature:              303 K

|                        | Calculated               | Reported                 |
|------------------------|--------------------------|--------------------------|
| Volume                 | 476.67(12)               | 476.67(12)               |
| Space group            | P 1                      | P 1                      |
| Hall group             | P 1                      | P 1                      |
| Moiety formula         | C17 H19 F N6 O4, 2(H2 O) | C17 H19 F N6 O4, 2(H2 O) |
| Sum formula            | C17 H23 F N6 O6          | C17 H23 F N6 O6          |
| Mr                     | 426.41                   | 426.41                   |
| Dx, g cm <sup>-3</sup> | 1.485                    | 1.485                    |
| Z                      | 1                        | 1                        |
| Mu (mm <sup>-1</sup> ) | 0.120                    | 0.120                    |
| F000                   | 224.0                    | 224.0                    |
| F000'                  | 224.12                   |                          |
| h, k, lmax             | 6, 12, 13                | 6, 12, 13                |
| Nref                   | 4404[ 2202]              | 4237                     |
| Tmin, Tmax             | 0.980, 0.990             | 0.578, 0.746             |
| Tmin'                  | 0.951                    |                          |

Correction method= # Reported T Limits: Tmin=0.578 Tmax=0.746  
AbsCorr = MULTI-SCAN

Data completeness= 1.92/0.96

Theta(max)= 27.528

R(reflections)= 0.0450( 2959)

wR2(reflections)=  
0.1013( 4237)

S = 1.055

Npar= 280

---

The following ALERTS were generated. Each ALERT has the format

**test-name\_ALERT\_alert-type\_alert-level.**

Click on the hyperlinks for more details of the test.

---

**Alert level C**

STRVA01\_ALERT\_4\_C                    Flack test results are meaningless.  
    From the CIF: `_refine_ls_abs_structure_Flack`      0.200  
    From the CIF: `_refine_ls_abs_structure_Flack_su`      0.600  
PLAT340\_ALERT\_3\_C Low Bond Precision on C-C Bonds ..... 0.00607 Ang.  
PLAT420\_ALERT\_2\_C D-H Bond Without Acceptor N5        --H5A        .        Please Check  
PLAT420\_ALERT\_2\_C D-H Bond Without Acceptor N6        --H6A        .        Please Check

---

**Alert level G**

PLAT005\_ALERT\_5\_G No Embedded Refinement Details Found in the CIF        Please Do !  
PLAT007\_ALERT\_5\_G Number of Unrefined Donor-H Atoms .....            11 Report  
    H1    H3    H5A   H5B   H6A   H6B   H7    H00A H00B H00C H00D  
PLAT032\_ALERT\_4\_G Std. Uncertainty on Flack Parameter Value High .        0.600 Report  
PLAT154\_ALERT\_1\_G The s.u.'s on the Cell Angles are Equal ..(Note)        0.005 Degree  
PLAT398\_ALERT\_2\_G Deviating C-O-C Angle From 120 for O2            .        109.8 Degree  
PLAT720\_ALERT\_4\_G Number of Unusual/Non-Standard Labels .....        6 Note  
    O007    H00A    H00B    O00B    H00C    H00D  
PLAT790\_ALERT\_4\_G Centre of Gravity not Within Unit Cell: Resd. #        2 Note  
    H2 O  
PLAT791\_ALERT\_4\_G Model has Chirality at C7                    (Sohncke SpGr)        R Verify  
PLAT791\_ALERT\_4\_G Model has Chirality at C8                    (Sohncke SpGr)        R Verify  
PLAT791\_ALERT\_4\_G Model has Chirality at C10                    (Sohncke SpGr)        R Verify  
PLAT791\_ALERT\_4\_G Model has Chirality at C11                    (Sohncke SpGr)        R Verify  
PLAT912\_ALERT\_4\_G Missing # of FCF Reflections Above STh/L= 0.600        13 Note  
PLAT916\_ALERT\_2\_G Hooft y and Flack x Parameter Values Differ by .        0.10 Check  
PLAT969\_ALERT\_5\_G The 'Henn et al.' R-Factor-gap value .....        1.707 Note  
    Predicted wR2: Based on SigI\*\*2 5.93 or SHELX Weight 9.60  
PLAT978\_ALERT\_2\_G Number C-C Bonds with Positive Residual Density.        0 Info

---

0 **ALERT level A** = Most likely a serious problem - resolve or explain  
0 **ALERT level B** = A potentially serious problem, consider carefully  
4 **ALERT level C** = Check. Ensure it is not caused by an omission or oversight  
15 **ALERT level G** = General information/check it is not something unexpected

1 ALERT type 1 CIF construction/syntax error, inconsistent or missing data  
5 ALERT type 2 Indicator that the structure model may be wrong or deficient  
1 ALERT type 3 Indicator that the structure quality may be low  
9 ALERT type 4 Improvement, methodology, query or suggestion  
3 ALERT type 5 Informative message, check

---

---

It is advisable to attempt to resolve as many as possible of the alerts in all categories. Often the minor alerts point to easily fixed oversights, errors and omissions in your CIF or refinement strategy, so attention to these fine details can be worthwhile. In order to resolve some of the more serious problems it may be necessary to carry out additional measurements or structure refinements. However, the purpose of your study may justify the reported deviations and the more serious of these should normally be commented upon in the discussion or experimental section of a paper or in the "special\_details" fields of the CIF. checkCIF was carefully designed to identify outliers and unusual parameters, but every test has its limitations and alerts that are not important in a particular case may appear. Conversely, the absence of alerts does not guarantee there are no aspects of the results needing attention. It is up to the individual to critically assess their own results and, if necessary, seek expert advice.

### **Publication of your CIF in IUCr journals**

A basic structural check has been run on your CIF. These basic checks will be run on all CIFs submitted for publication in IUCr journals (*Acta Crystallographica*, *Journal of Applied Crystallography*, *Journal of Synchrotron Radiation*); however, if you intend to submit to *Acta Crystallographica Section C* or *E* or *IUCrData*, you should make sure that full publication checks are run on the final version of your CIF prior to submission.

### **Publication of your CIF in other journals**

Please refer to the *Notes for Authors* of the relevant journal for any special instructions relating to CIF submission.

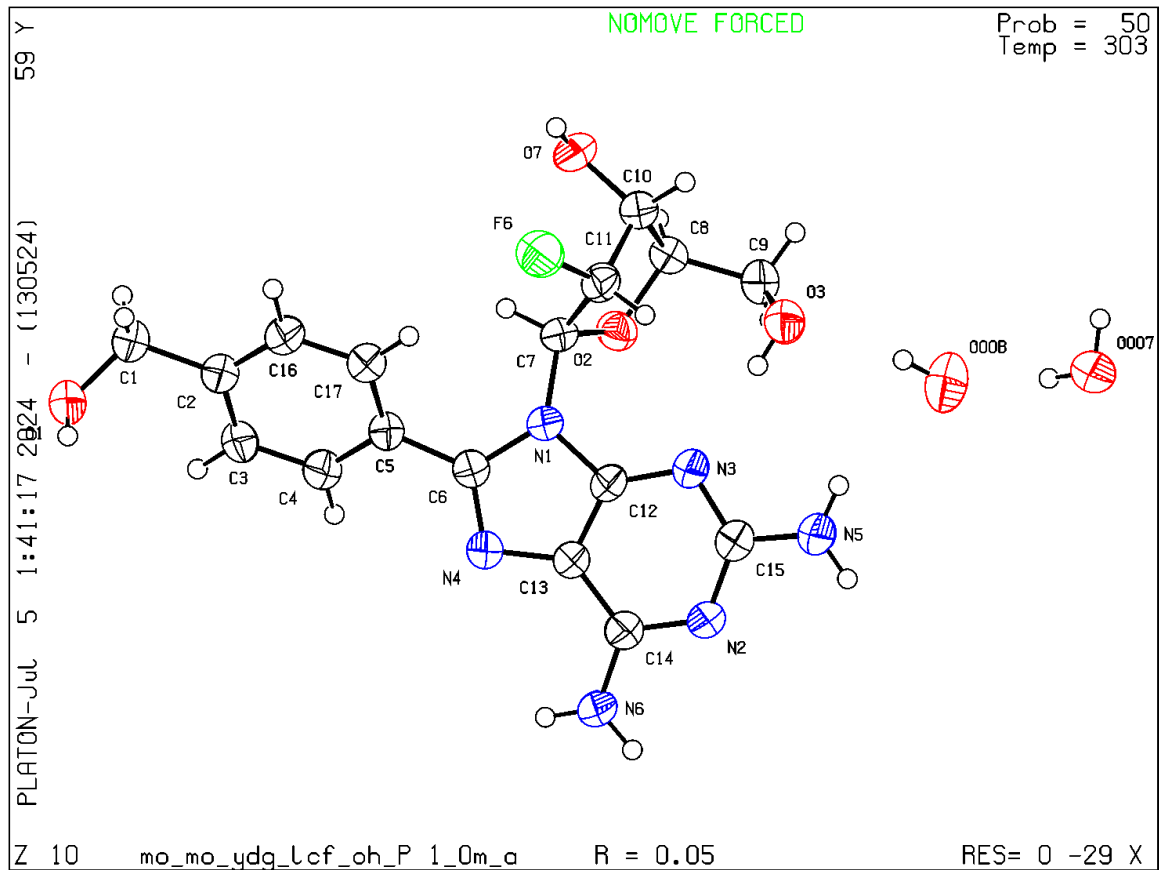

Supplement: Supplementary file 2 [file 2eec872815b51ea5a6187bf0.pdf]
